# Supplementary material for: Retinol from hepatic stellate cells via STRA6 induces lipogenesis on hepatocytes during fibrosis
Source: PubMed Central journal article supplement (PMC7789180; doi:10.1186/s13578-020-00509-w), 2021-01-06
Supplement: 13578_2020_509_MOESM1_ESM.pdf [file 13578_2020_509_MOESM1_ESM.pdf]

Figure S1

**A**

**\*Mouse liver tissue**

|                        |   |   |
|------------------------|---|---|
| Lrat:Cas9-ERT2:sgTif1y | - | + |
| TMX                    | + | + |

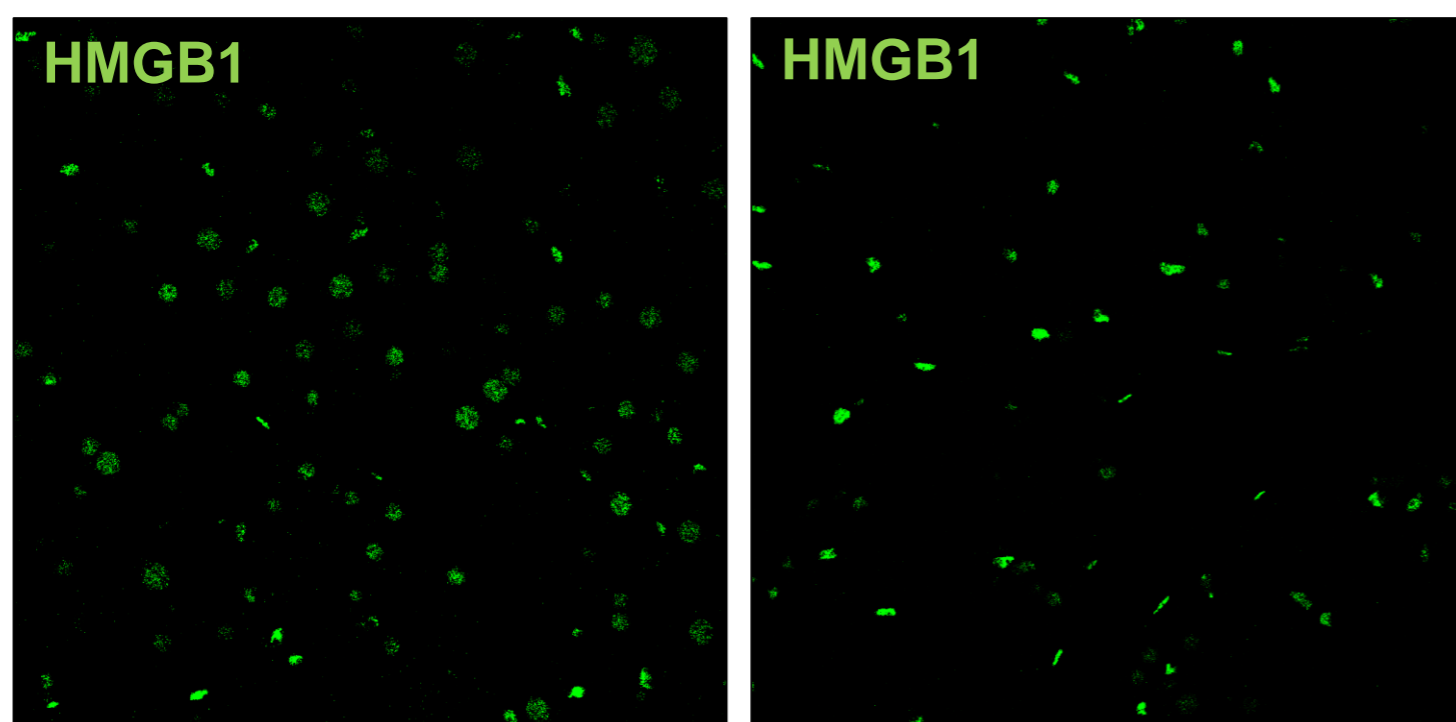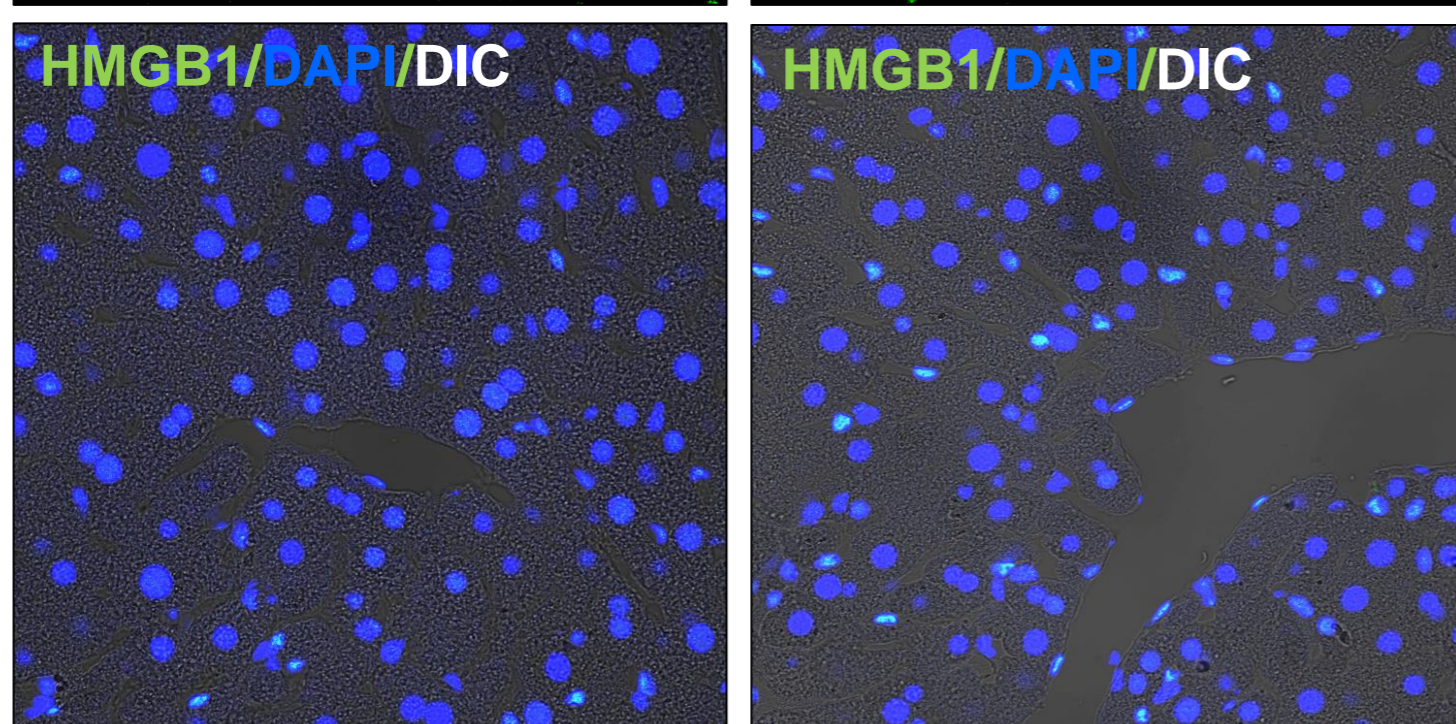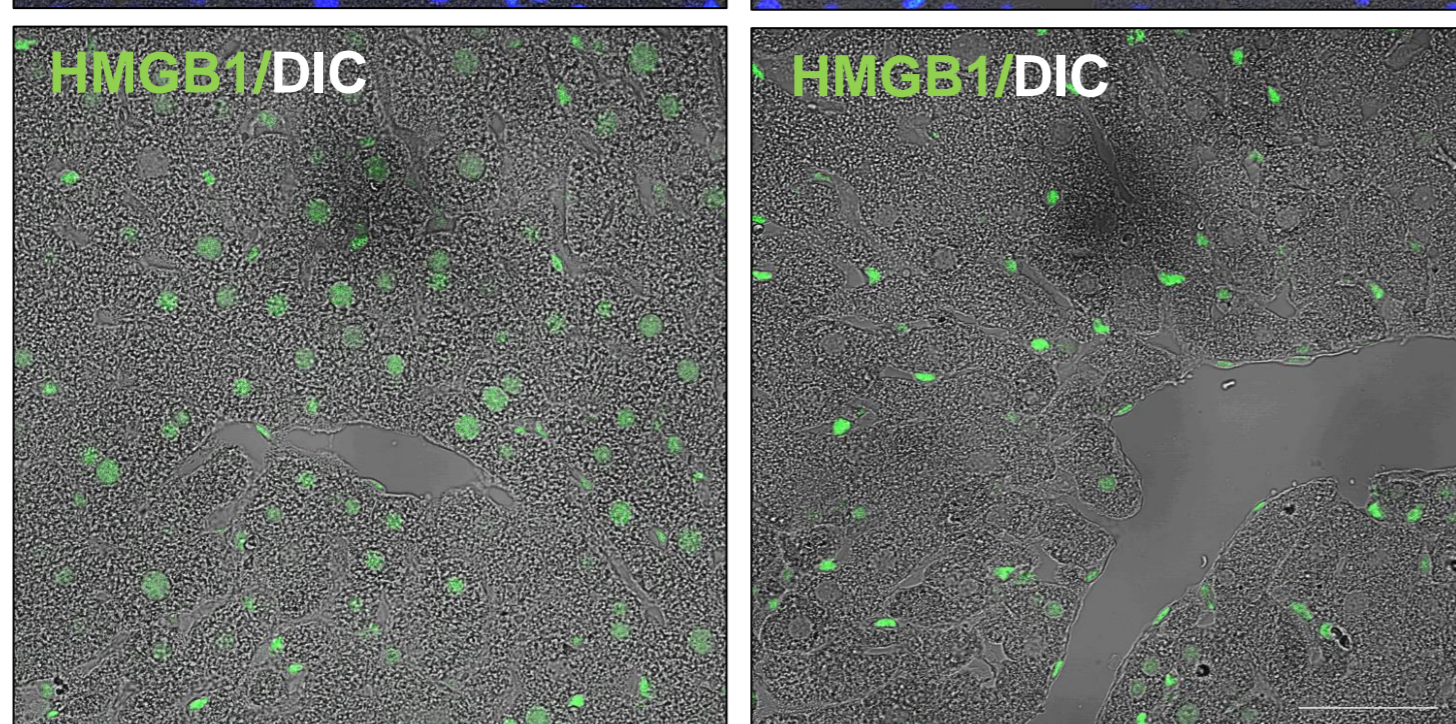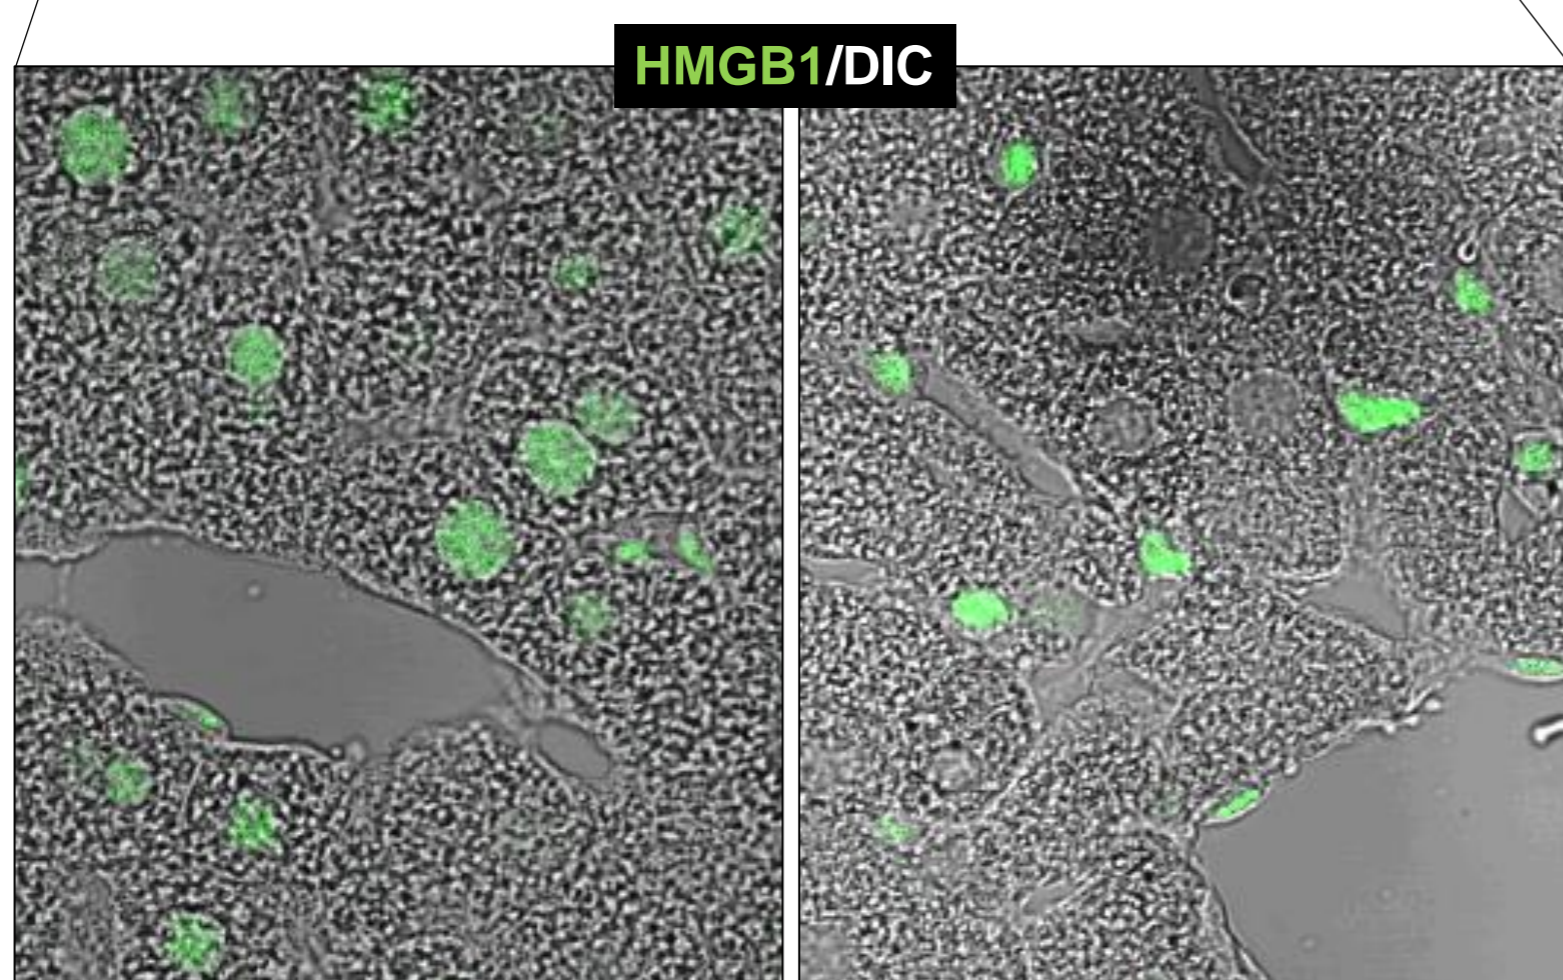

**B**

**\*HepG2 cell**

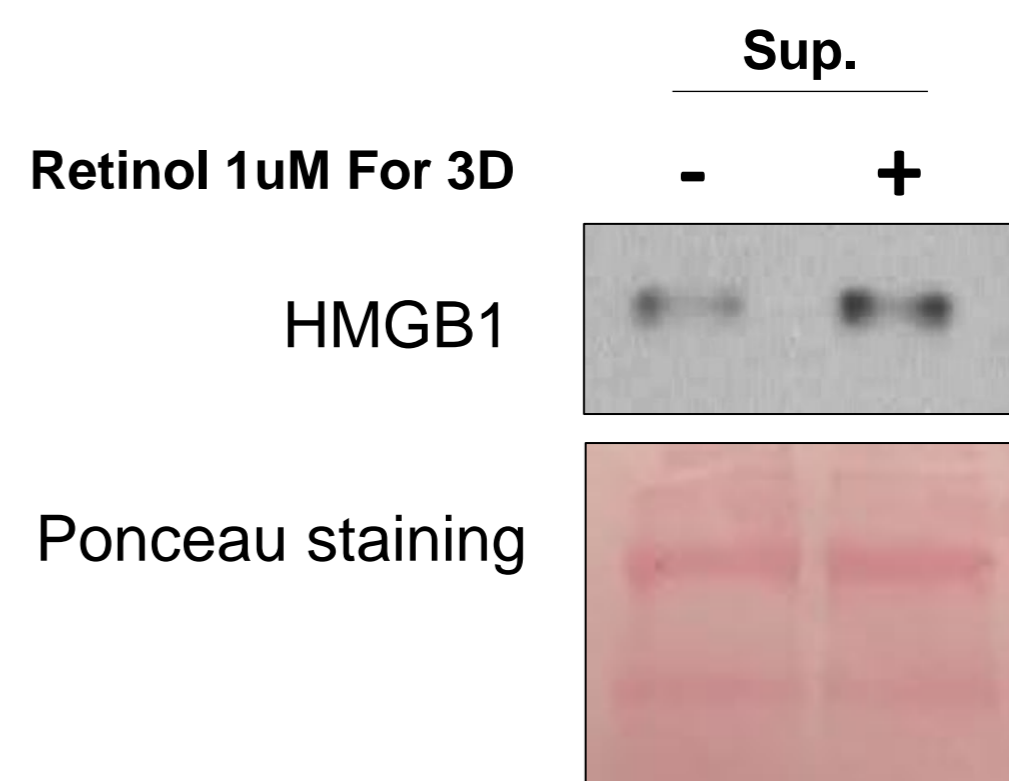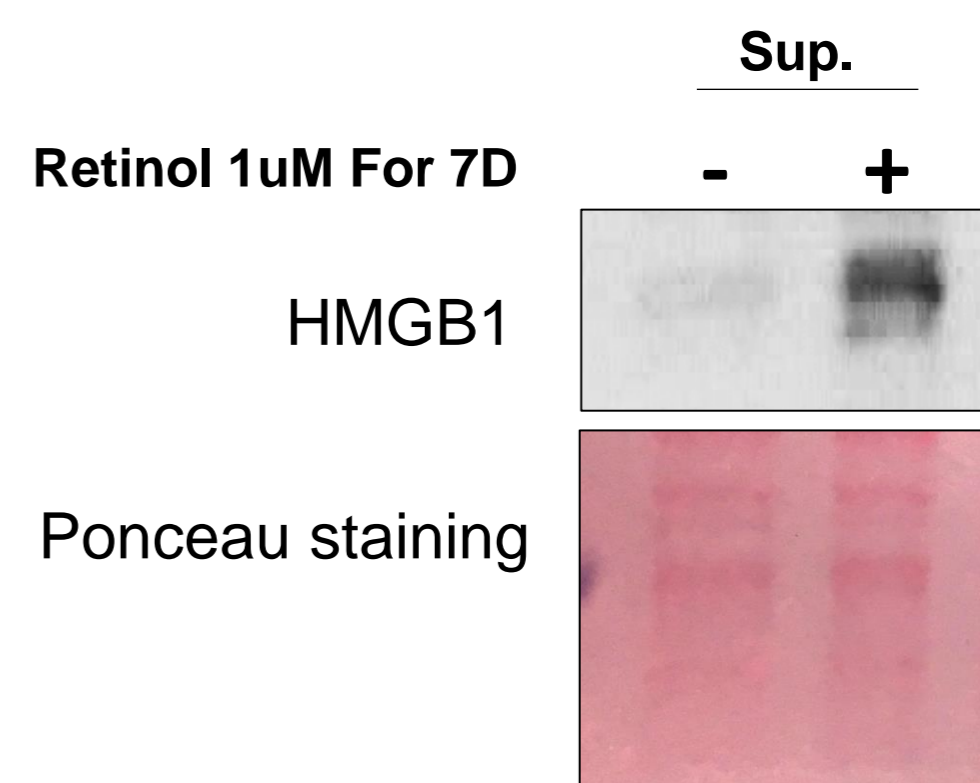



Figure S2

**\*HepaRG Cell (human primary cell)**

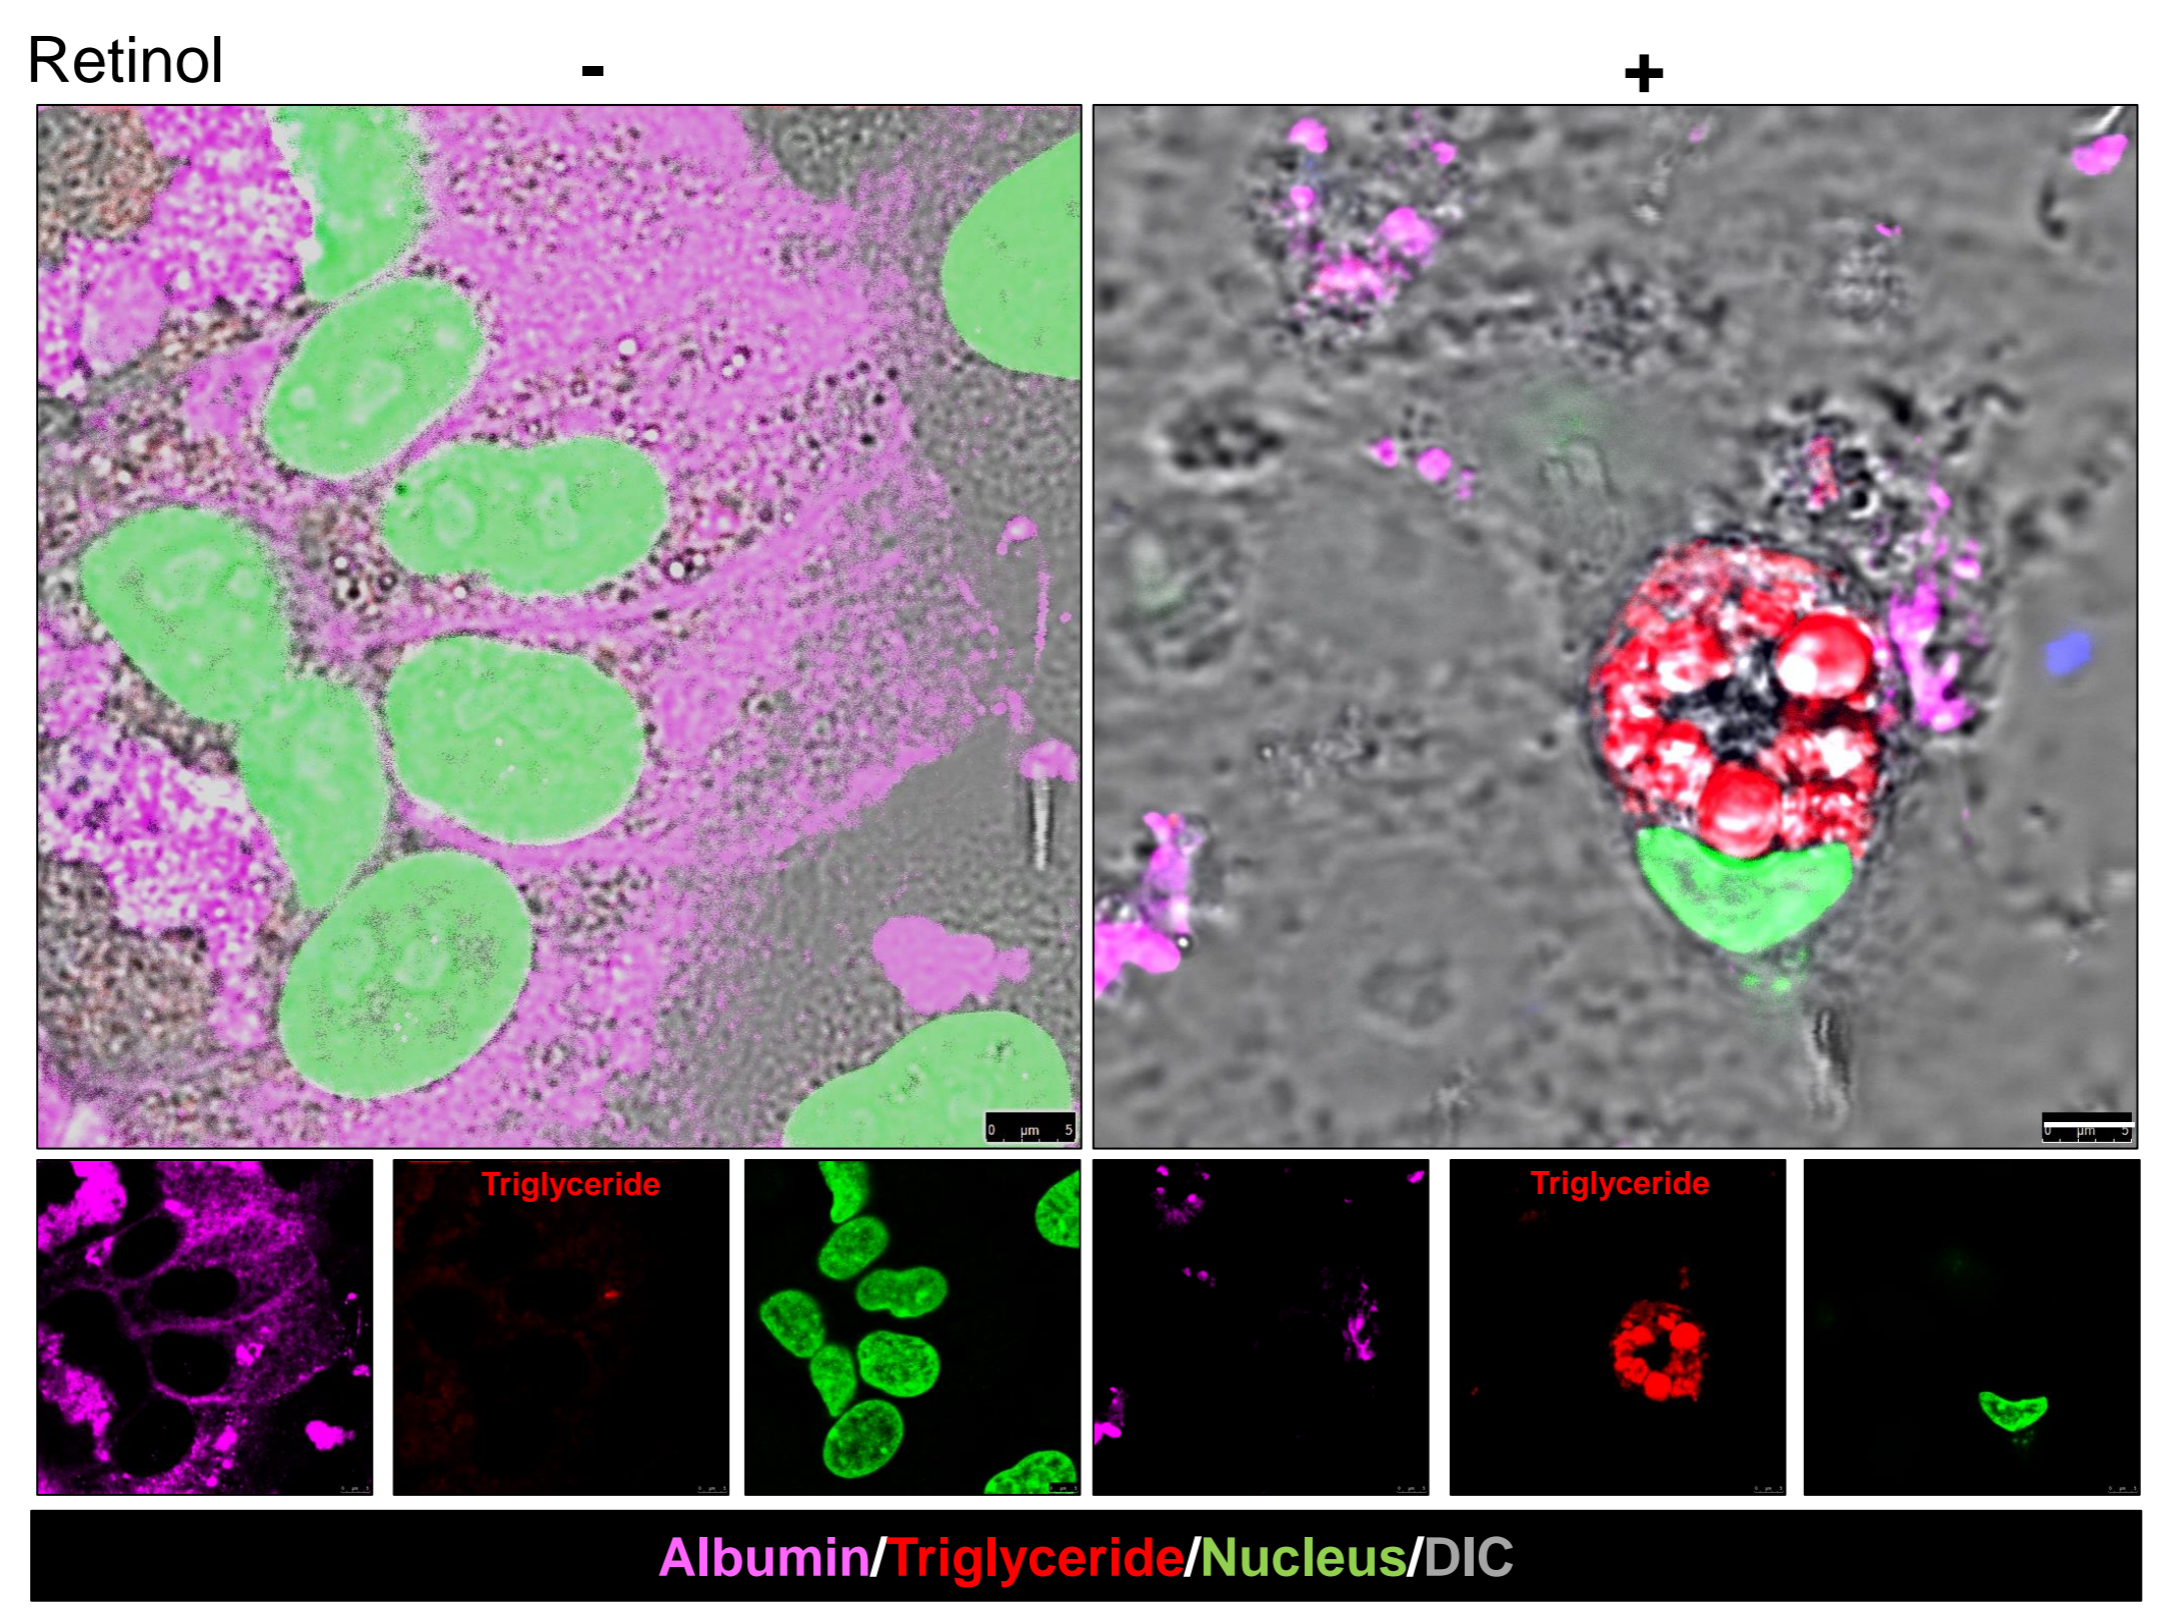

**Additional data**

Albumin/Triglyceride  
/Nucleus/DIC

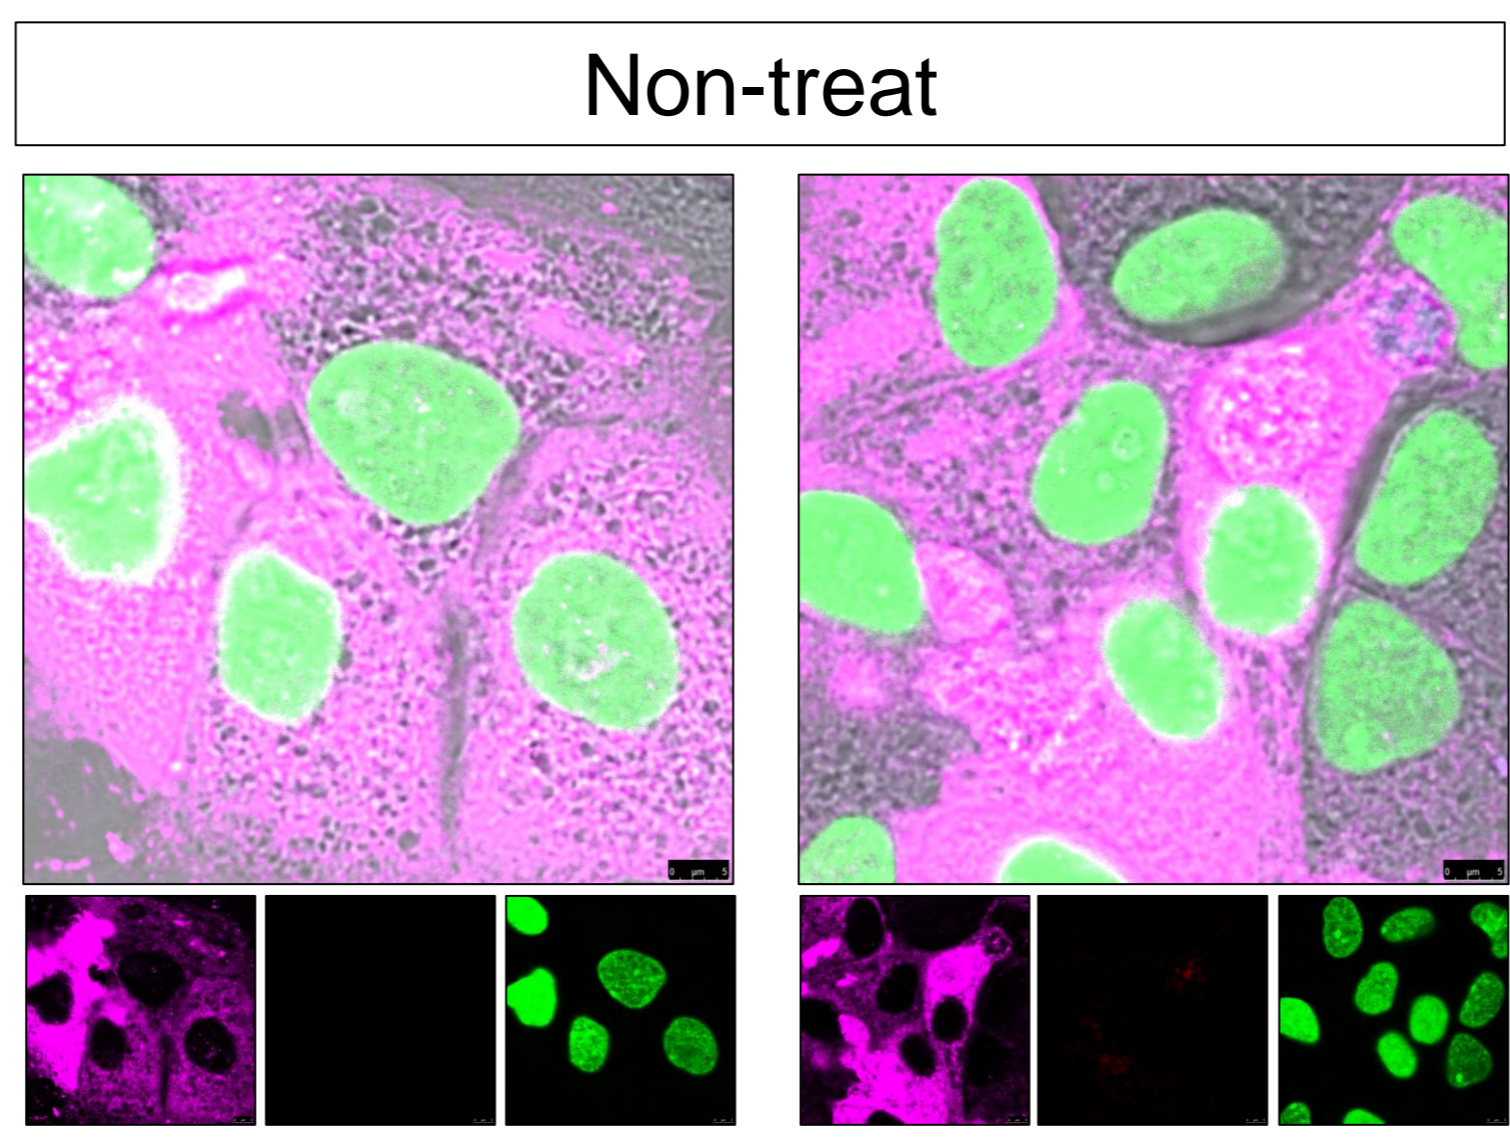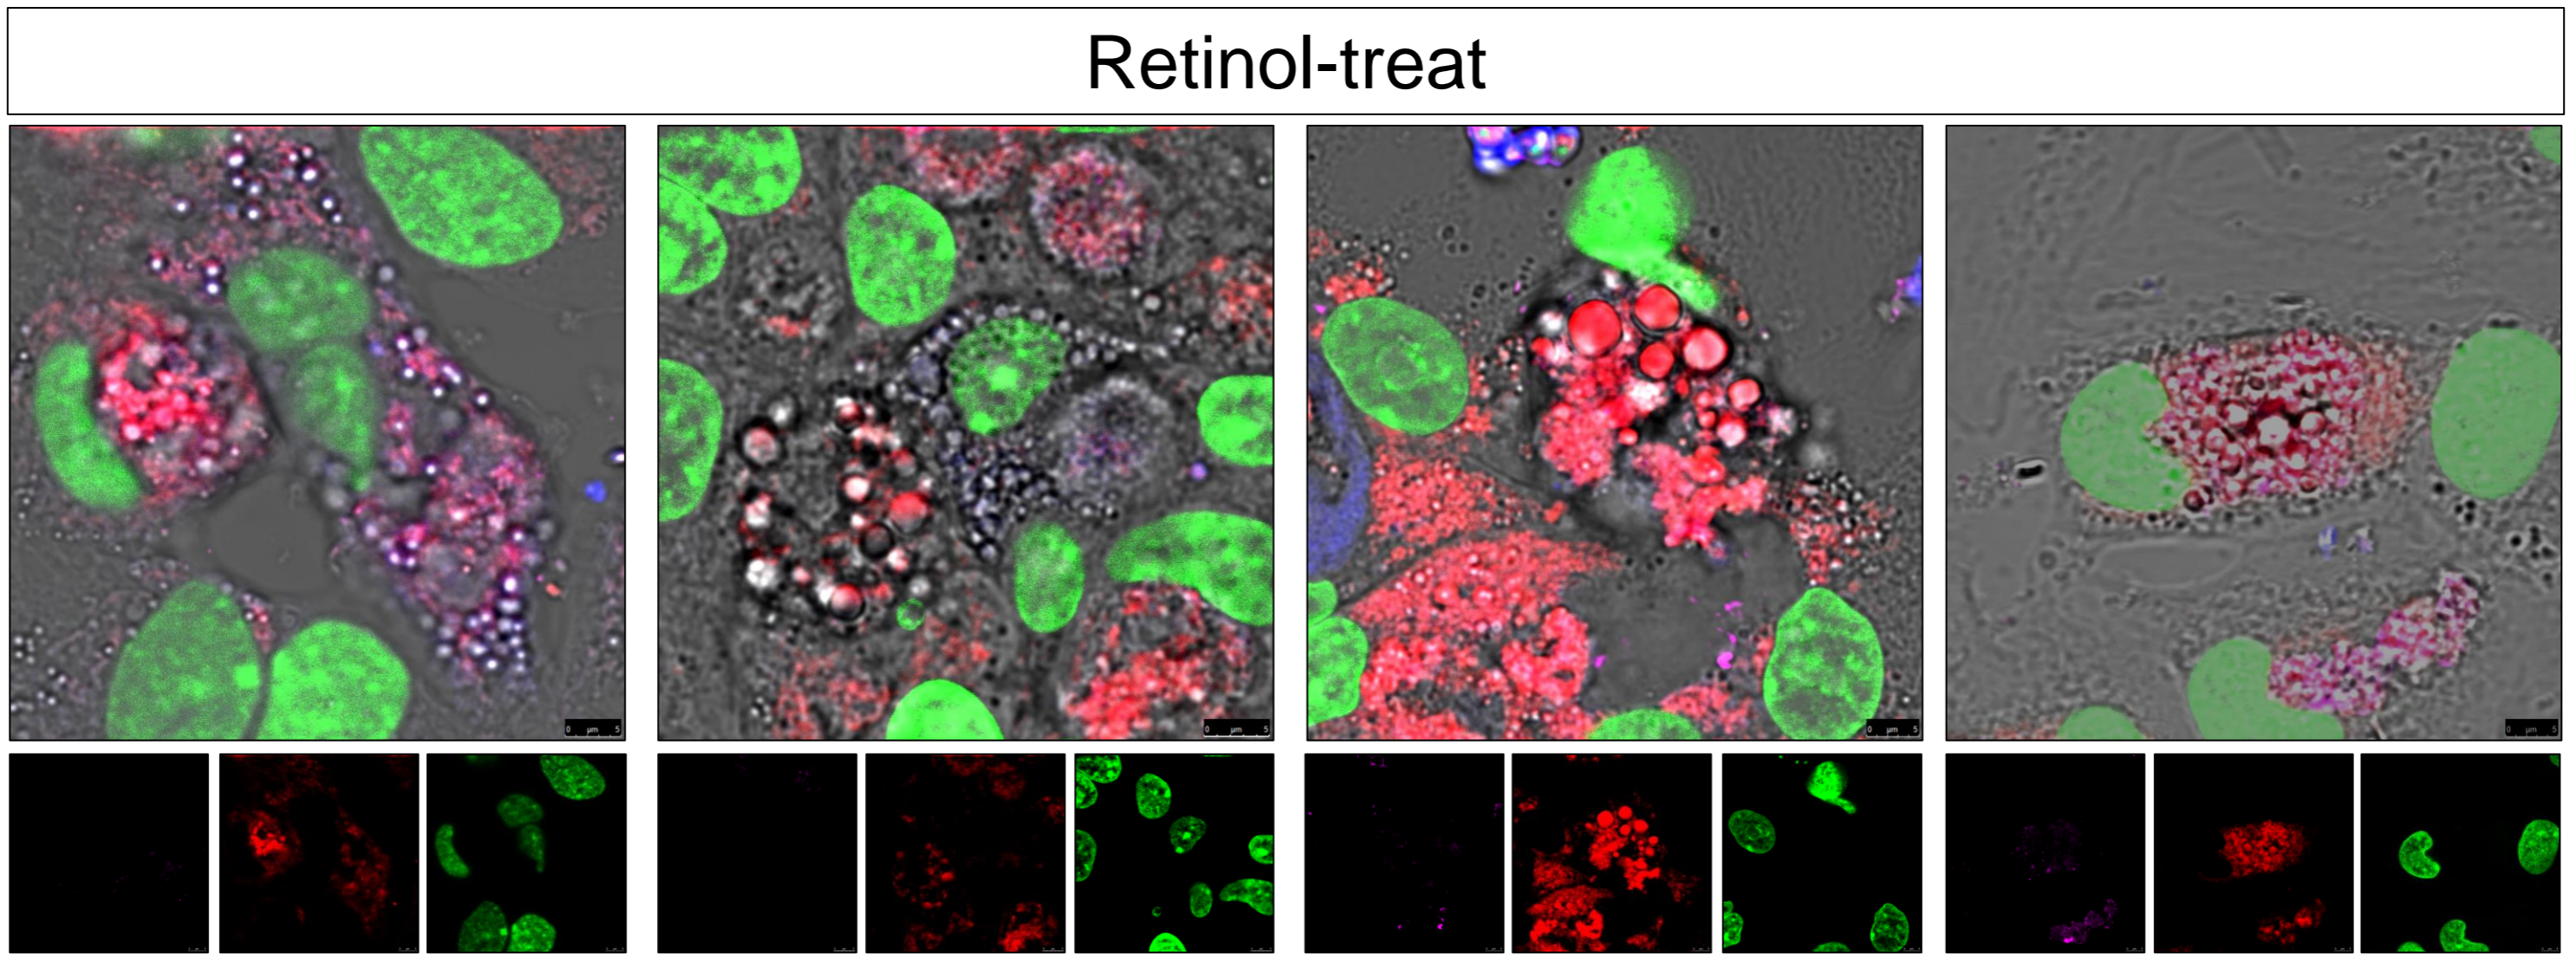



Figure S3

**A**

\*LX2 cell line

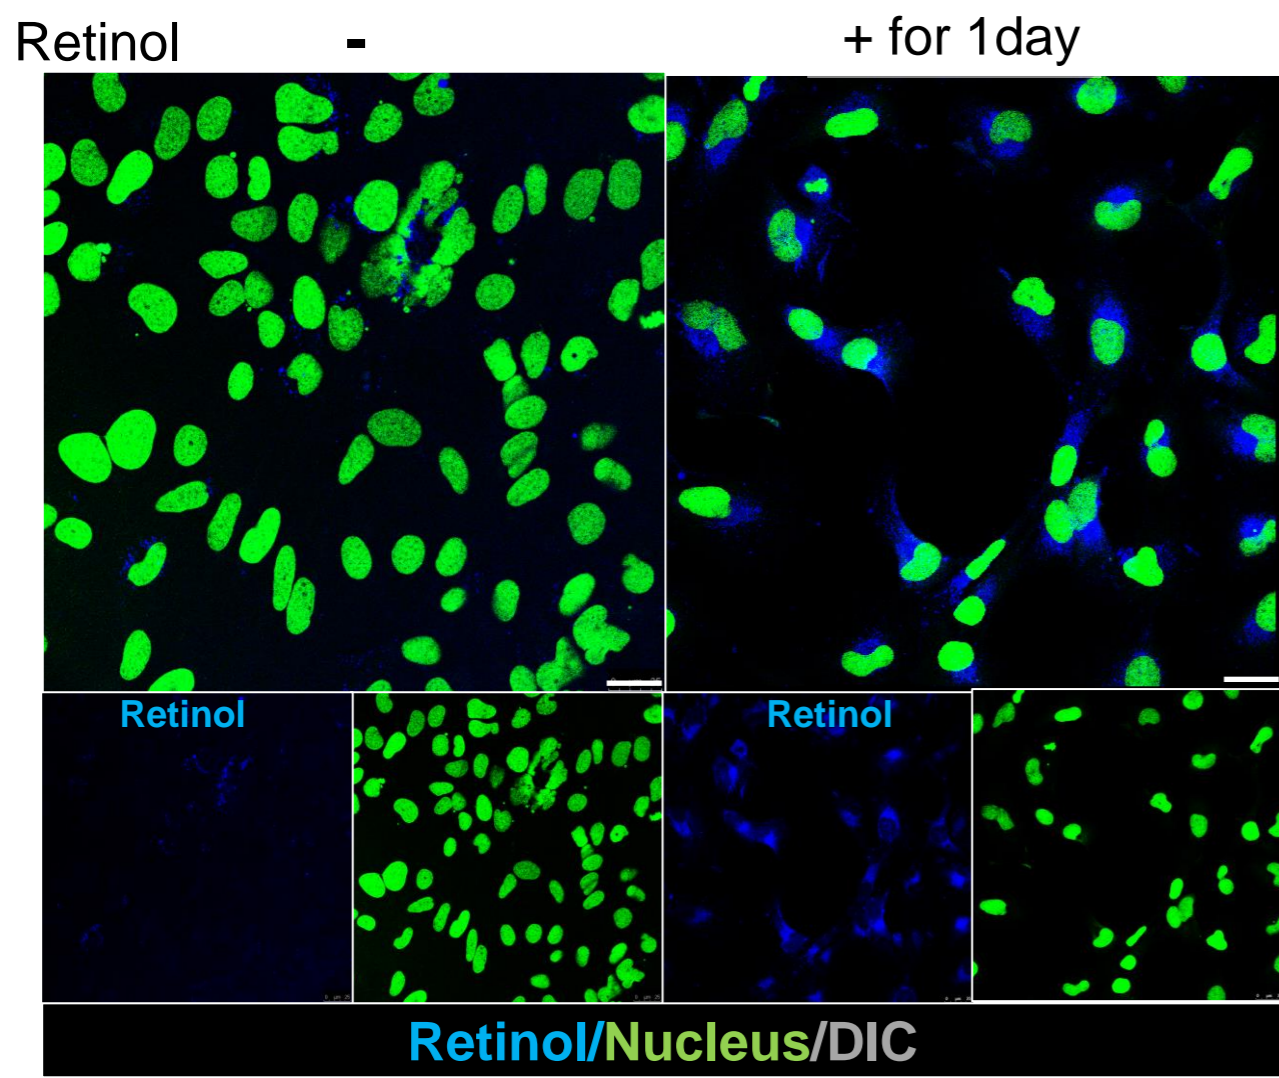

**B**

\*LX2 cell line

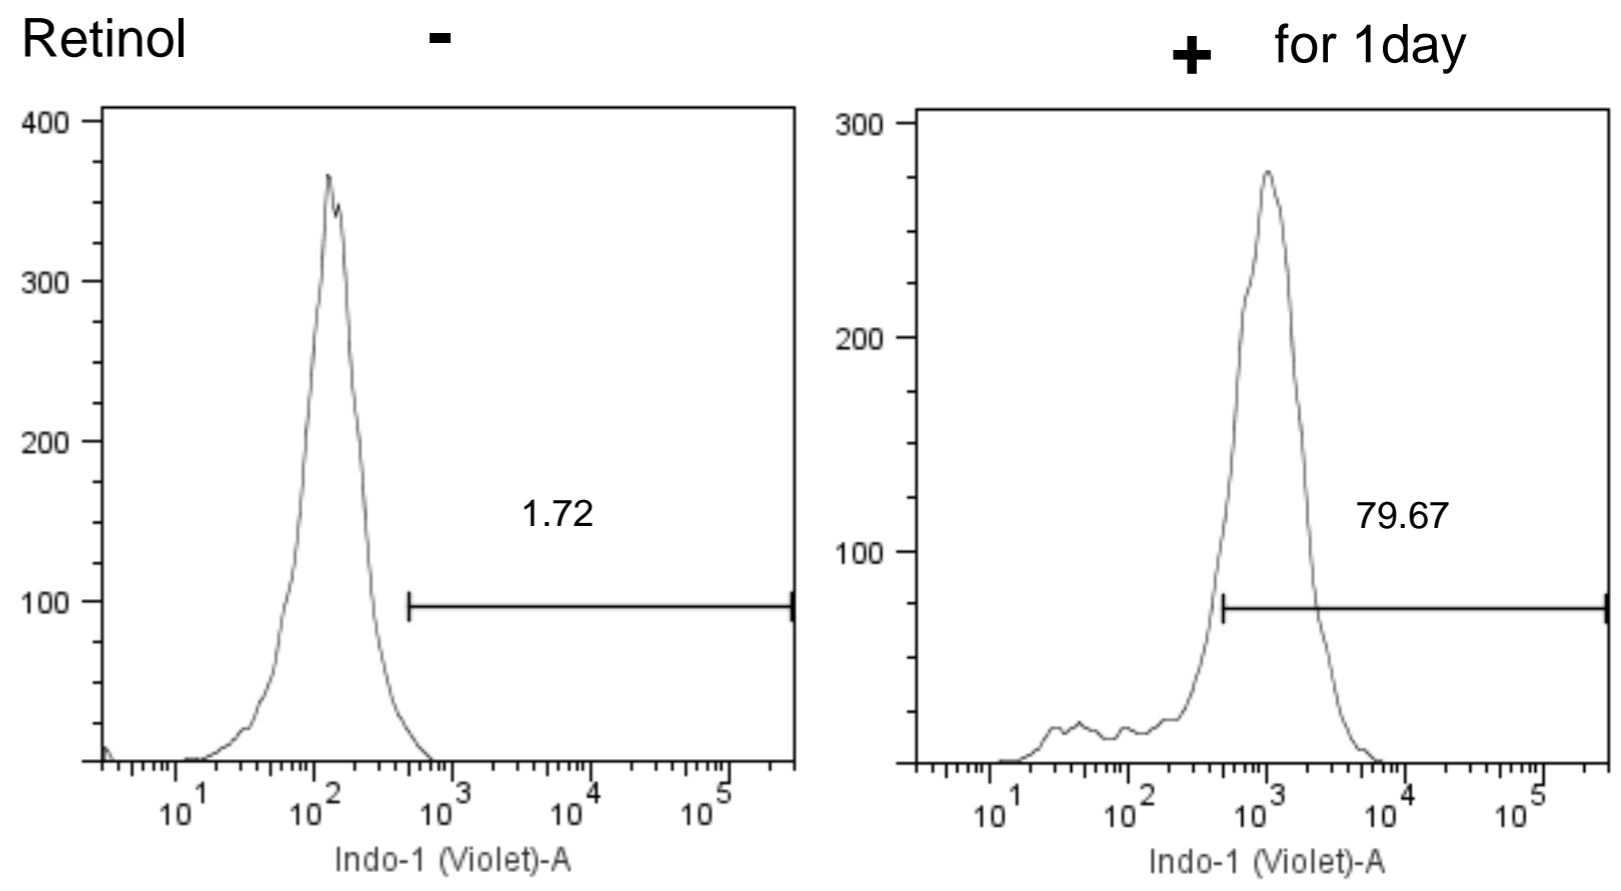

**C**

\*LX2 cell line

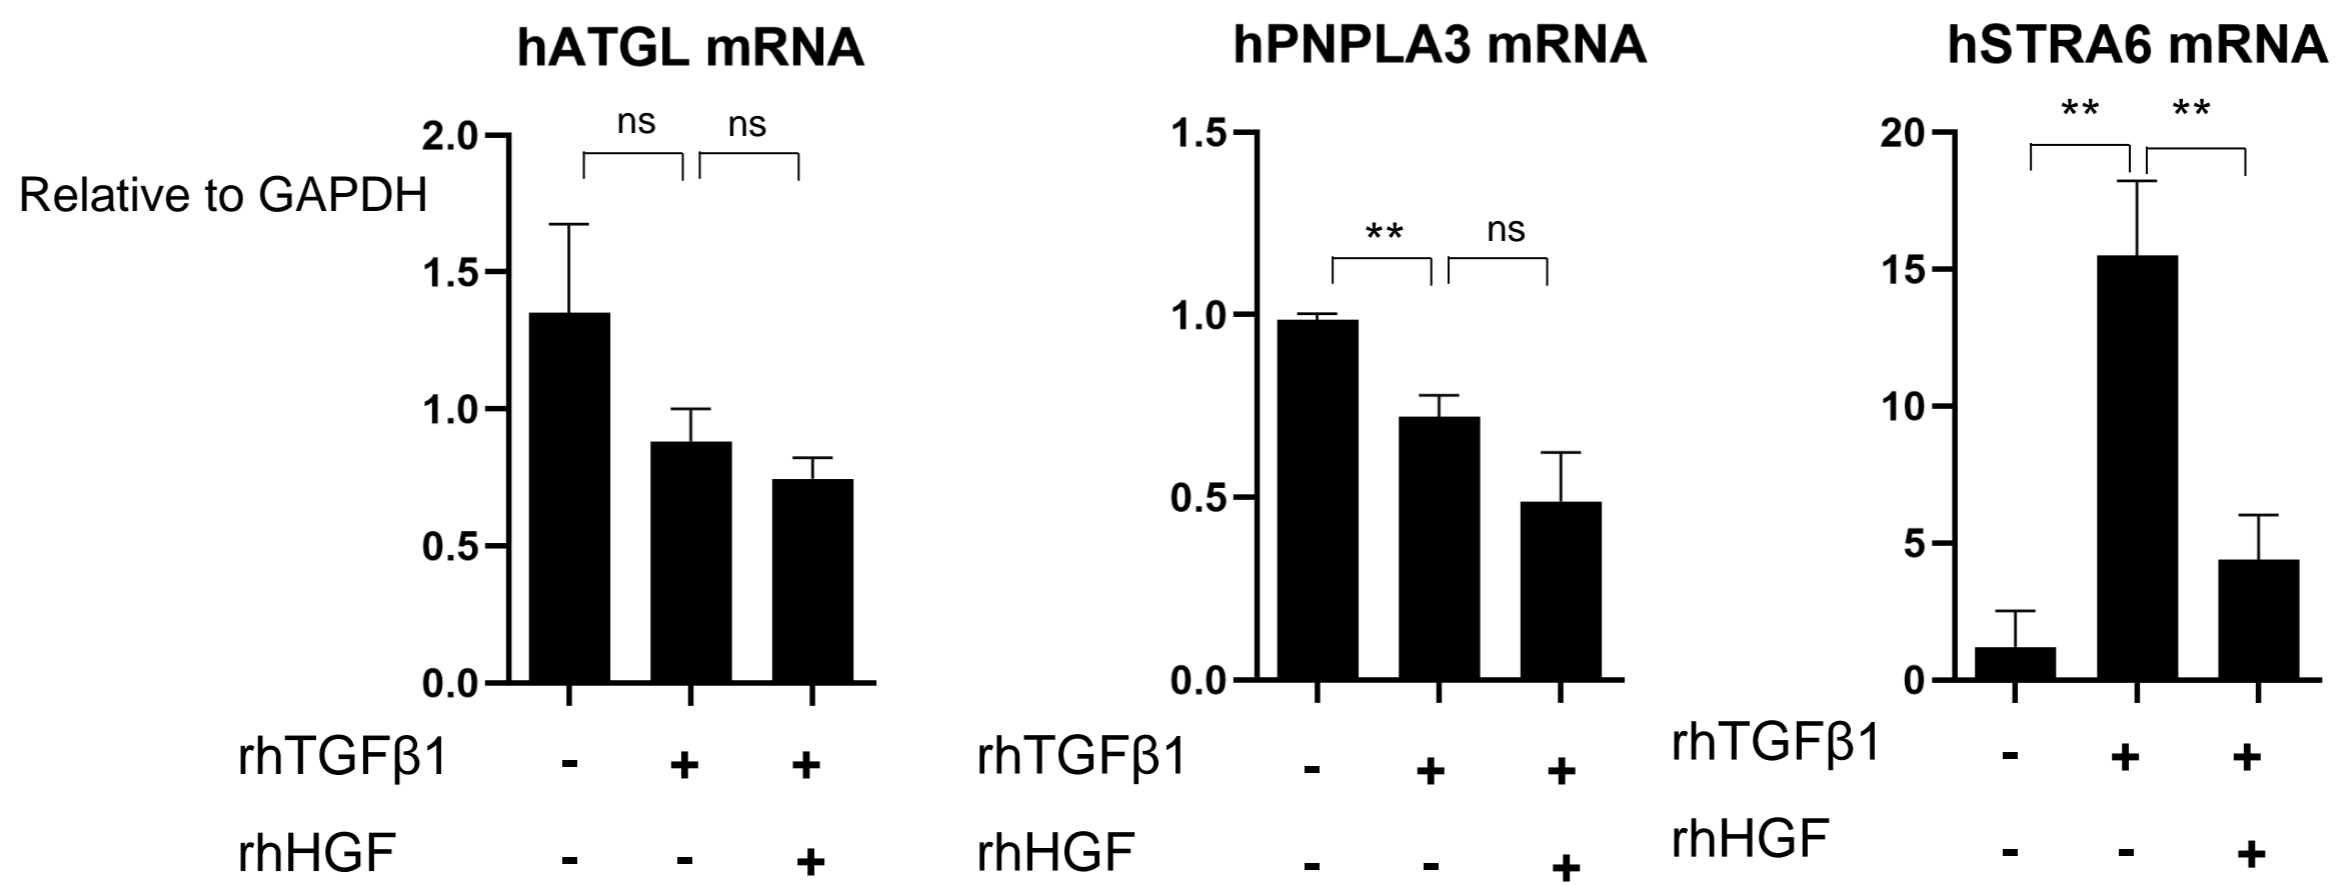

**D**

\*LX2 cell line

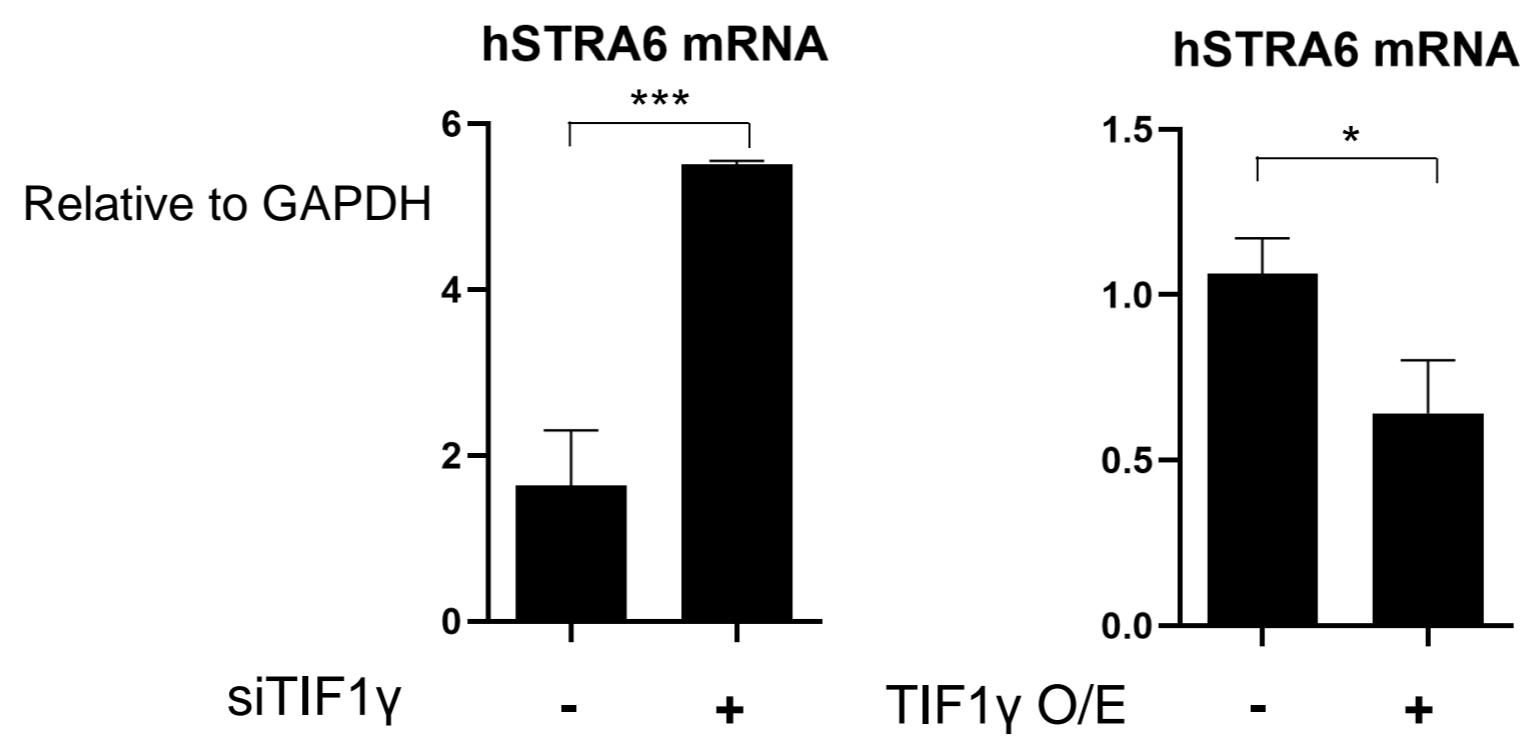

Figure S4

**\*293T cell line**

|                    |   |   |   |   |
|--------------------|---|---|---|---|
| Retinol            | - | - | + | + |
| STRA6<br>-myc/Flag | - | + | - | + |

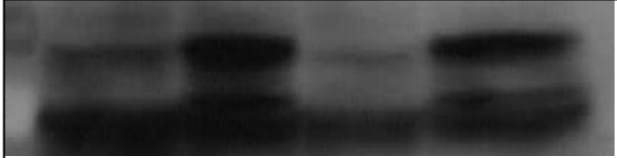

STRA6(N-term)

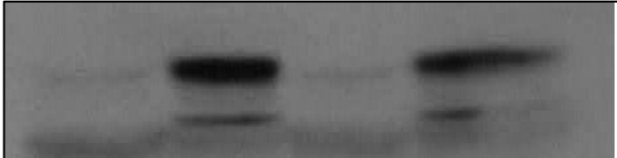

myc(c-term)

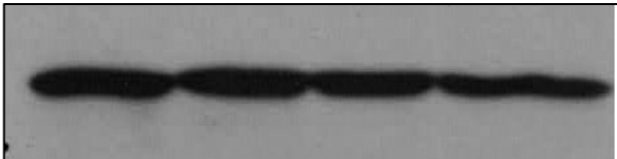

GAPDH
